# Supplementary material
Source: PubMed Central journal article supplement (PMC8428658)
Supplement: NIHMS1734650-supplement-supp1-3037820.pdf [file NIHMS1734650-supplement-supp1-3037820.pdf]

APPENDIX: SUMMARY OF SELECTED TURNING ALGORITHMS USING WEARABLE INERTIAL SENSORS\*

| Authors                     | Sensor Location Used to Analyses a Turn                    | Number of Subjects                                                                        | Protocol                                                                                                                              | Expected Turn Angle                                     | Turn Metrics Used                                                                                                                                                                           | Accuracy of Turn Angle (°) Estimation                                                             |
|-----------------------------|------------------------------------------------------------|-------------------------------------------------------------------------------------------|---------------------------------------------------------------------------------------------------------------------------------------|---------------------------------------------------------|---------------------------------------------------------------------------------------------------------------------------------------------------------------------------------------------|---------------------------------------------------------------------------------------------------|
| Fleury et al. [13] (2007)   | Upper trunk                                                | HC: n = 8                                                                                 | Walk back and forth with ten 180° turn<br>Walk, go up and down the stairs and make four 180° turn and eight 90° turn                  | 180°<br>90°                                             | Turn angle (°)                                                                                                                                                                              | Not provided;<br>Representative figure only                                                       |
| Higashi et al. [14] (2008)  | Lumbar and Thigh                                           | HC: n = 10<br>Hemiplegic: n = 20                                                          | 3-meter Timed Up and Go (TUG)                                                                                                         | 180°                                                    | Turn duration (s)                                                                                                                                                                           | Not provided                                                                                      |
| Salarian et al.[3] (2009)   | Sternum and Shank                                          | PD: n =12<br>HC: n = 14                                                                   | 7 meter walk straight, turn and return back to original position X 3 times                                                            | 180°                                                    | Peak angular velocity (°/s)<br>Turn duration (s)<br>Number of steps in turn (#)<br>Average step time (s)<br>Maximum step time (s)<br>Step before the turn (s)<br>Number of double steps (#) | Not provided                                                                                      |
| Mariani et al. [4] (2010)   | Feet                                                       | Young HC: n = 10<br>Elderly HC: n = 10                                                    | 5-meter U-shaped walking task<br>Figure 8-shaped walking task, and<br>6-min walking task                                              | 180° and continuous turns range from -150° to 150°      | Turn angle (°)                                                                                                                                                                              | Validated against optical motion capture<br>For 180° turn: 1.6 ± 6.1° (mean Accuracy ± precision) |
| Weiss et al. [15] (2013)    | Lumbar                                                     | With IADL (Instrumented Activity of daily living disability): n=52<br>Without IADL: n=177 | Timed Up and Go (TUG)                                                                                                                 | 180°                                                    | Peak angular velocity (°/s)<br>Turn duration (s)<br>Number of steps in turn (#)<br>Range of acceleration (g)                                                                                | Not provided                                                                                      |
| Mariani et al. [16] (2013)  | Feet                                                       | PD: n=10 (ON and OFF states)<br>HC: n=10                                                  | 3-meter Timed Up and Go (TUG)                                                                                                         | 180°                                                    | Turn duration (s)<br>Turn angle (s)                                                                                                                                                         | Validated against optical motion capture<br>0.12 ± 3.59° (Accuracy ± precision)                   |
| El-Gohary et al. [1] (2014) | Lumbar                                                     | Lab: PD: n=21<br>HC: n=19<br>Home: PD: n=12<br>HC: n=18                                   | Lab: Pre-planned turns with different directions and angles (slow, self-preferred, and fast pace)<br>Home: A week of daily activities | Lab: 45°<br>90°<br>135°<br>180°<br>Home:<br>Free-living | Number of turns (#)<br>Peak angular velocity (°/s)<br>Mean angular velocity (°/s)<br>Turn duration (s)                                                                                      | Not provided                                                                                      |
| Novak et al. [17] (2014)    | Head<br>Upper back<br>Lower back<br>Thigh<br>Shank<br>Foot | HC: n=10<br>Amputee: n=1                                                                  | Pre-planned turns with different directions and angles                                                                                | 22°<br>45°<br>90°                                       | Turn onset (ms)<br>Turn direction (±)<br>Turn angle (°)                                                                                                                                     | Not provided                                                                                      |
| Nguyen et al. [18] (2015)   | Sternum                                                    | HC: n = 16                                                                                | 10-meter Timed Up and Go (TUG) X 2 times                                                                                              | 180°                                                    | Walk-to-Turn transition (ms)<br>Turn-to-Walk transition (ms)<br>Turn-to-Stand transition (ms)                                                                                               | Not provided                                                                                      |
| Fino et al. [19] (2015)     | Sternum and Shank                                          | HC: n = 5                                                                                 | Pre-planned turns with 90° (slow, self-preferred, and fast pace) and four obstacle heights                                            | 90°                                                     | Step vs spin turns (#)                                                                                                                                                                      | Not provided                                                                                      |
| Beyea et al.[6] (2017)      | Sternum                                                    | HC: n = 11                                                                                | 3- and 5-meter Timed Up and Go (TUG) X 3 times (with normal and slow speed)                                                           | 180°                                                    | Turn duration (s)                                                                                                                                                                           | Not provided                                                                                      |
| Pham et al. [2] (2017)      | Lumbar                                                     | PD: n = 25 (both, ON and                                                                  | 90 min consisted of daily activity-like procedures,                                                                                   | Free-living                                             | Turn onset (ms)<br>Turn direction (±)                                                                                                                                                       | Validated against video<br>Two clinical observers                                                 |

|                                    |                                                                   |                                                                                                                                                                                                           |                                                                                                                                                                                                                                                                                             |                                                        |                                                                                                                                                                                                     |                                                                                                                                                                                                                                                                                                                                  |
|------------------------------------|-------------------------------------------------------------------|-----------------------------------------------------------------------------------------------------------------------------------------------------------------------------------------------------------|---------------------------------------------------------------------------------------------------------------------------------------------------------------------------------------------------------------------------------------------------------------------------------------------|--------------------------------------------------------|-----------------------------------------------------------------------------------------------------------------------------------------------------------------------------------------------------|----------------------------------------------------------------------------------------------------------------------------------------------------------------------------------------------------------------------------------------------------------------------------------------------------------------------------------|
|                                    |                                                                   | OFF states)<br>HC: n = 14                                                                                                                                                                                 | such as walking in the rooms and corridors of the lab environment without restriction, opening and closing doors, climbing stairs, performing transfers such as sit-to-stand, sit-to-walk, stand-to-sit, and walk-to-sit, brushing teeth, making coffee, drinking a cup of tea, and ironing |                                                        | Turn duration (s)<br>Turn angle (°)                                                                                                                                                                 | rated every vertical rotation $\geq 45^\circ$ as a turn<br>ICC with the clinical score: 0.92<br>Turn angle: $0.06 \pm 0.14^\circ$ (mean error $\pm$ SEM)<br>Turn angle error is the difference in turning angle from observers and algorithm                                                                                     |
| Bertoli et al. [7] (2017)          | Lumbar                                                            | PD-FOG: n = 25<br>PD-nFOG: n = 18                                                                                                                                                                         | 2-min walk with $180^\circ$ turns<br>1-min turn in-place (alternative $360^\circ$ turning in the opposite direction)                                                                                                                                                                        | $180^\circ$<br>$360^\circ$                             | Turn duration (s)<br>Peak angular velocity (°/s)<br>Turn Jerk ( $g^2/s$ )<br>Turn range (g)                                                                                                         | Not provided                                                                                                                                                                                                                                                                                                                     |
| Haertner et al. [8] (2018)         | Lumbar                                                            | PD: n = 43<br>Vigorous (n=18): no fear of fall (FOF) + no fall history<br>Anxious (n=12): with FOF + no fall history<br>Stoic (n=8): no FOF + with fall history<br>Aware (n=5): with FOF and fall history | Lab: 7-meter Timed Up and Go (TUG)<br>Home: Median of 12 days of continuous monitoring                                                                                                                                                                                                      | Lab: $180^\circ$<br>Home: Free-living                  | Turn duration (s)<br>Turn angle (°)<br>Average angular velocity (°/s)<br>Peak angular velocity (°/s)<br>Start angular velocity (°/s)<br>Middle angular velocity (°/s)<br>End angular velocity (°/s) | Lab (same as Pham et al. 2017 [2]):<br>iTUG<br>Vigorous: $183 \pm 7^\circ$<br>Anxious: $178 \pm 9^\circ$<br>Stoic: $181 \pm 4^\circ$<br>Aware: $172 \pm 12^\circ$<br>Home: Not provided (Slight change to Pham et al. 2017 [2])                                                                                                  |
| Meghji et al. [9] (2019)           | Sternum (over the mid-point of the thoracic vertebrae (T4 to T6)) | Recreational male athletes: n = 6                                                                                                                                                                         | Pre-planned turns with different directions and angles X 5 times                                                                                                                                                                                                                            | $45^\circ$<br>$90^\circ$<br>$135^\circ$<br>$180^\circ$ | Turn angle (°)                                                                                                                                                                                      | Left turn (mean $\pm$ SD):<br>$43.6 \pm 1.7^\circ$<br>$89.0 \pm 2.5^\circ$<br>$135.3 \pm 2.8^\circ$<br>$180.3 \pm 4.4^\circ$<br>Right turn (mean $\pm$ SD):<br>$44.7 \pm 2.0^\circ$<br>$90.4 \pm 3.4^\circ$<br>$133.5 \pm 3.3^\circ$<br>$183.1 \pm 3.5^\circ$                                                                    |
| Hsieh et al. [17] (2019)           | Lumbar                                                            | HC: n=5<br>Knee osteoarthritis: n=5                                                                                                                                                                       | 5-meter and 10-meter TUG X 3 times                                                                                                                                                                                                                                                          | $180^\circ$                                            | Turn duration (s)                                                                                                                                                                                   | Not provided                                                                                                                                                                                                                                                                                                                     |
| Ortega-Bastidas et al. [18] (2019) | Lumbar                                                            | Young HC: n = 25<br>Elderly HC: n = 12                                                                                                                                                                    | 3-meter TUG X 3 times                                                                                                                                                                                                                                                                       | $180^\circ$                                            | Steps in a turn (#)<br>Mean angular velocity (°/s)                                                                                                                                                  | Not provided                                                                                                                                                                                                                                                                                                                     |
| Rehman et al. [12] (2020)          | Head<br>Neck<br>Lumbar<br>Ankles                                  | HC: n = 56<br>PD: n = 37                                                                                                                                                                                  | Straight walk along 10-meter instrumented walkway X 4 times                                                                                                                                                                                                                                 | $180^\circ$                                            | Turn angle (°)<br>Turn duration (s)<br>Number of turns (#)<br>Peak angular velocity (°/s)<br>Mean angular velocity (°/s)<br>[an additional 420 measures]                                            | Validated against video ICC between the rater and algorithm $\geq 0.99$ for start and end of a turn.<br>Lumbar:<br>HC: $172.59 \pm 22.99^\circ$<br>PD: $168.37 \pm 29.33^\circ$<br>Neck:<br>HC: $105.35 \pm 25.05^\circ$<br>PD: $92.65 \pm 31.50^\circ$<br>Head:<br>HC: $134.51 \pm 29.76^\circ$<br>PD: $138.32 \pm 32.34^\circ$ |

\*only includes manuscripts in which a new approach to detect a turn using inertial sensors automatically is presented and does not include manuscripts in which an already published algorithm was used or in which a turn was detected manually.
